# Supplementary material
Source: PubMed Central journal article supplement (PMC9300743)
Supplement: 41467_2022_31749_MOESM3_ESM.pdf [file 41467_2022_31749_MOESM3_ESM.pdf]

### **Description of Additional Supplementary Files**

File Name: Supplementary Data 1

Description: Genbank accession numbers for the 229E, OC43, NL63, SARS-like and MERS analyses.
